# Supplementary material for: Chitosan supported silver nanowires as a platform for direct electrochemistry and highly sensitive electrochemical glucose biosensing
Source: Royal Society of Chemistry journal article supplement (doi:10.1039/c5ra24259b), 2016-01-01
Supplement: c5ra24259b1.pdf [file c5ra24259b1.pdf]

**Supporting information for:**

**Chitosan supported silver nanowire as a platform for direct electrochemistry and highly sensitive electrochemical glucose biosensing**

*Siva Kumar-Krishnan,<sup>ab\*</sup> S. Chakaravarthy,<sup>c</sup> A. Hernandez-Rangel,<sup>a</sup> E. Prokhorov,<sup>a</sup> G.*

*Luna-Bárceñas,<sup>a</sup> Rodrigo Esparza,<sup>b</sup> and M. Meyyapan.<sup>d</sup>*

<sup>a</sup>Cinvestav Queretaro, Querétaro QRO, 76230, México.

<sup>b</sup>Centro de Física Aplicada y Tecnología Avanzada, Universidad Nacional Autónoma de México, Boulevard Juriquilla 3001, Santiago de Querétaro, Qro., 76230, México.

<sup>c</sup>Department of Nanoscience and nanotechnology, CINVESTAV-IPN, DF, CP 07360, Mexico.

<sup>d</sup>NASA Ames Research Center, Moffett Field, CA 94035, USA.

\* Corresponding author: [skumar@fata.unam.mx](mailto:skumar@fata.unam.mx)

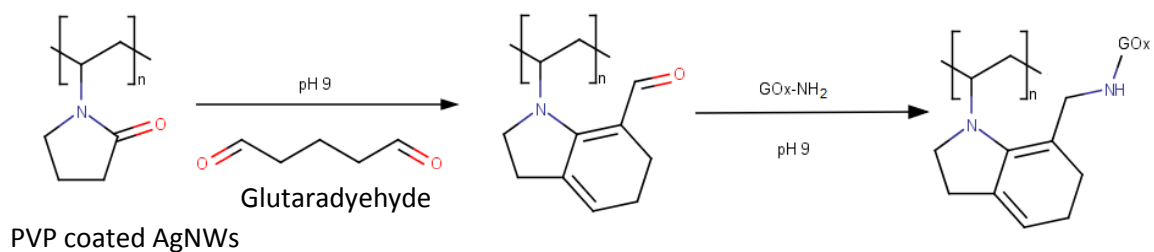

**Figure S1:** Surface modification and covalent anchoring of PVP coated AgNWs with the redox active cofactor (FAD) in the GOx enzyme.

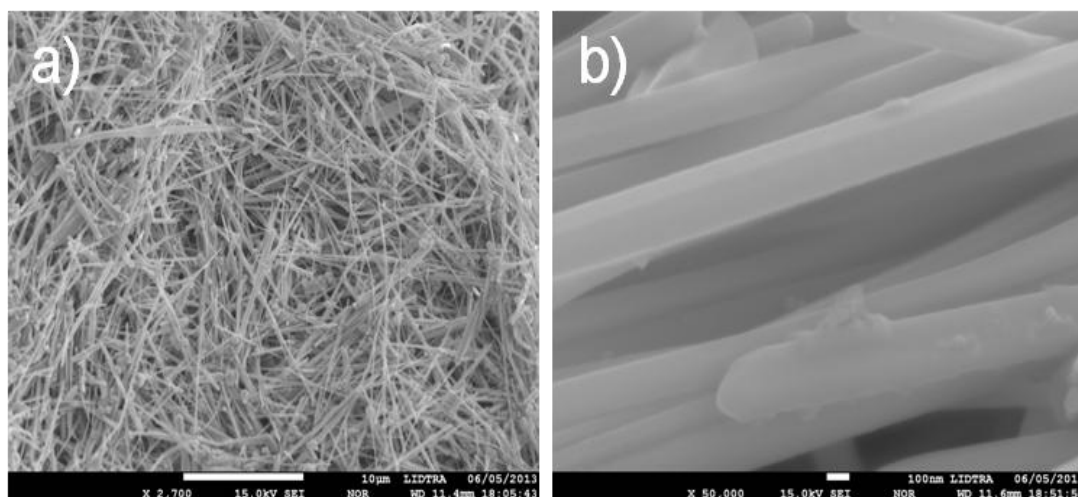

**Figure S2:** a) Low and b) high magnification FESEM image of as-prepared AgNWs.

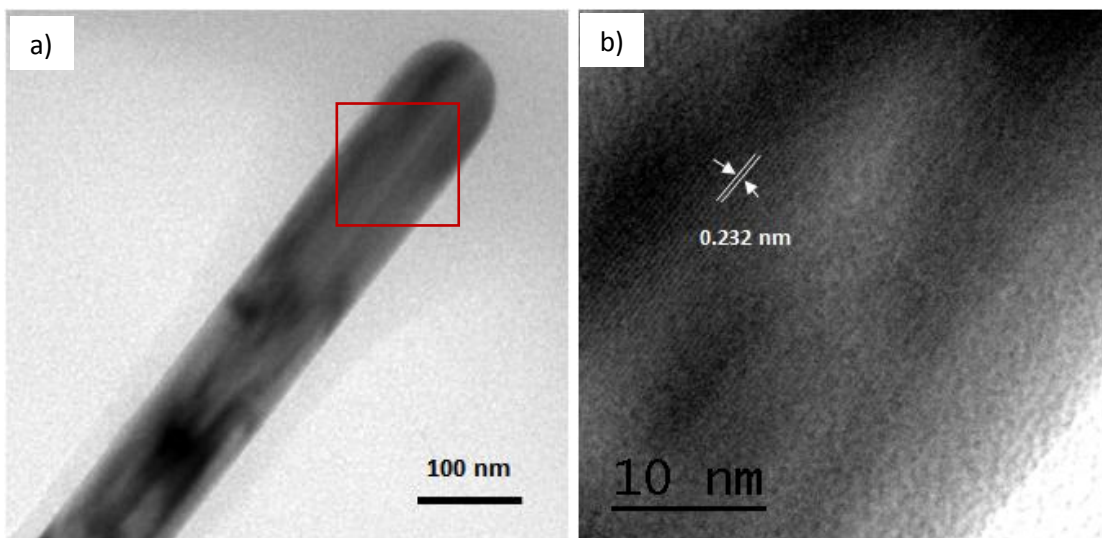

**Figure S3:** a) TEM image of the Single AgNWs b) HR-TEM image of portion marked in red box in Fig. a.

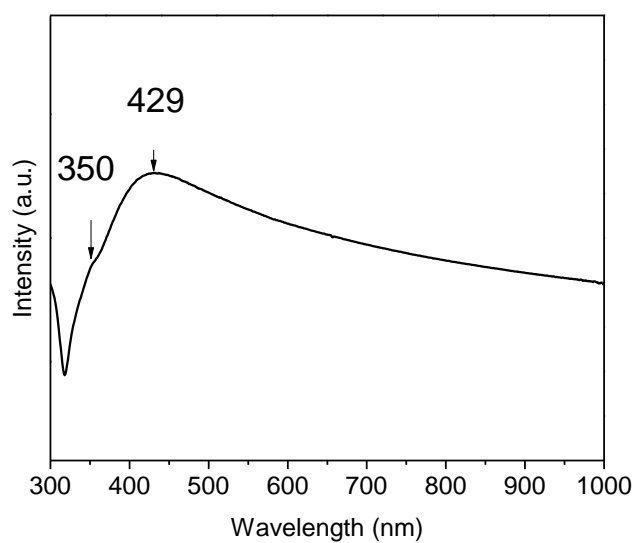

**Figure S4.** UV-vis spectrum of silver nanowires dispersed in deionized water.

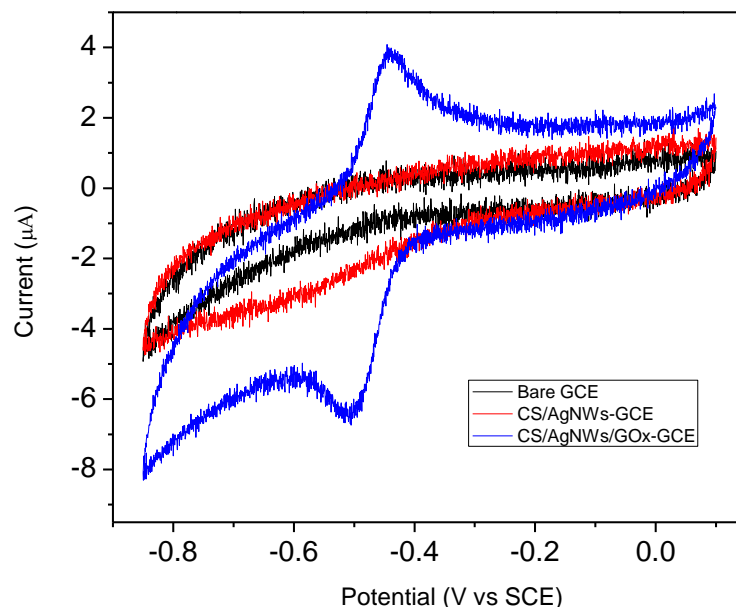

**Figure S5.** CVs of bare GCE, CS/AgNWs-GCE, and CS/AgNWs/GOx-GCE modified electrodes measured in 0.1 M nitrogen ( $N_2$ ) saturated PBS solution (PH=7.4) at a scan rate of  $50 \text{ mV S}^{-1}$ .

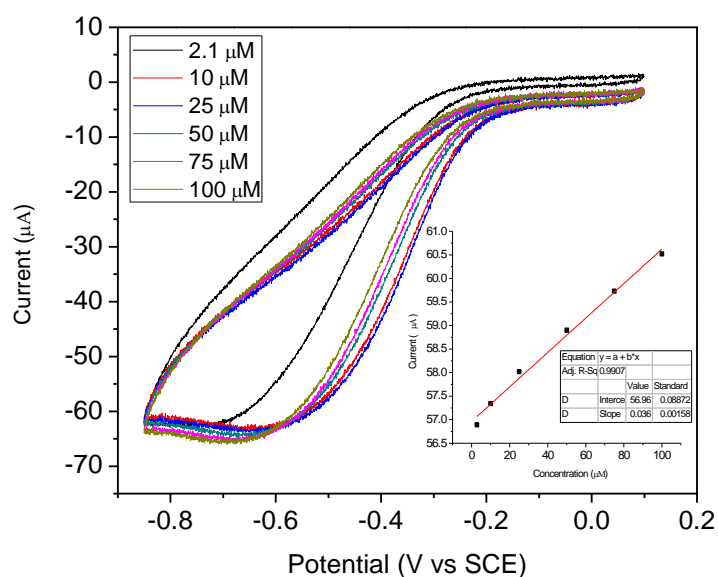

**Figure S6.** CVs of CS/AgNWs/GOx-GCE modified electrodes measured in 0.1 M nitrogen ( $O_2$ ) saturated PBS solution (PH=7.4) at a scan rate of  $50 \text{ mV S}^{-1}$  by successive addition of 2.1, 10, 25, 50, 75 and 100  $\mu\text{M}$  glucose. Inset: the calibration plot with different concentrations of glucose exhibiting a linear fitting ( $R^2 = 0.9907$ ).

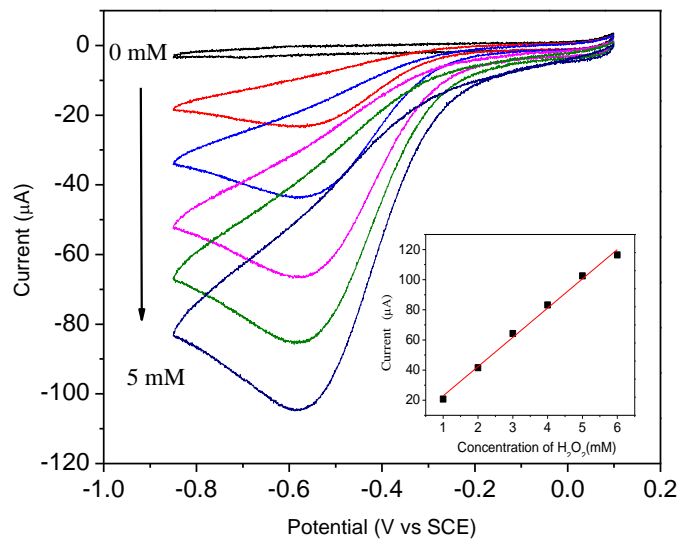

**Figure S7.** Amperometric response corresponding to the successive addition of hydrogen peroxide (H<sub>2</sub>O<sub>2</sub>) in a N<sub>2</sub>-saturated 0.1 M PBS (pH 7.4) at a scan rate of 50 mV s<sup>-1</sup>. Inset: the corresponding calibration plot for current as a function of H<sub>2</sub>O<sub>2</sub> concentration ( $R^2 = 0.98$ ). The CVs of CS/AgNWs-GCE show that the nanowires can effectively detect H<sub>2</sub>O<sub>2</sub>.
